# Supplementary material for: Optimization of Ink Composition and 3D Printing Process to Develop Soy Protein-Based Scaffolds
Source: MDPI journal article supplement (doi:10.3390/gels10040223), 2024-03-25
Supplement: s1 [file s1]

## Supplementary Material

**Table S1.** Parameters of the Carreau-Yasuda rheological model and shear rate value in the printing tip wall for all samples as a function of PVA, SA and GEL and heat treatment (H).

| <i>Sample</i>  | $\eta_0$<br>(Pa·s) | $\eta_\infty$<br>(Pa·s) | $\lambda_c$<br>(s) | $a$  | $n$  | $R^2$ | $\dot{\gamma}_w$<br>(s <sup>-1</sup> ) |
|----------------|--------------------|-------------------------|--------------------|------|------|-------|----------------------------------------|
| SPI20PVA       | 1190.5             | 4.9                     | 5.5                | 0.8  | 0.20 | 0.99  | -                                      |
| SPI25PVA       | 121.8              | 4.5                     | 0.5                | 5.3  | 0.37 | 0.99  | 68                                     |
| SPI25PVA-H     | 1518.0             | 5.6                     | 3.4                | 4.3  | 0.22 | 0.99  | 91                                     |
| SPI30PVA       | 365.0              | 8.2                     | 1.5                | 0.9  | 0.34 | 0.99  | -                                      |
| SPI25PVA1SA    | 294.1              | 4.0                     | 1.1                | 1.9  | 0.33 | 0.99  | 72                                     |
| SPI25PVA1SA-H  | 1458.0             | 1.0                     | 5.0                | 0.6  | 0.31 | 0.99  | 75                                     |
| SPI25PVA2SA    | 294.1              | 4.0                     | 1.1                | 1.9  | 0.33 | 0.99  | 72                                     |
| SPI25PVA2SA-H  | 860.6              | 8.0                     | 0.7                | 0.6  | 0.28 | 0.99  | 79                                     |
| SPI25PVA3SA    | 341.3              | 2.5                     | 1.0                | 1.8  | 0.40 | 0.99  | 66                                     |
| SPI25PVA3SA-H  | 1187.4             | 5.2                     | 3.3                | 1.1  | 0.28 | 0.99  | 79                                     |
| SPI25PVA1GEL   | 1208.9             | 8.7                     | 5.8                | 0.9  | 0.24 | 0.99  | 87                                     |
| SPI25PVA1GEL-H | 1688.1             | 0.0                     | 6.2                | 3.6  | 0.33 | 0.99  | 73                                     |
| SPI25PVA2GEL   | 1223.1             | 3.6                     | 3.1                | 1.1  | 0.23 | 0.99  | 88                                     |
| SPI25PVA2GEL-H | 1387.5             | 7.2                     | 4.8                | 2.7  | 0.24 | 0.99  | 87                                     |
| SPI25PVA3GEL   | 3499.9             | 0.0                     | 9.6                | 2.8  | 0.36 | 0.99  | 69                                     |
| SPI25PVA3GEL-H | 1870.5             | 5.8                     | 3.7                | 55.0 | 0.17 | 0.99  | 107                                    |

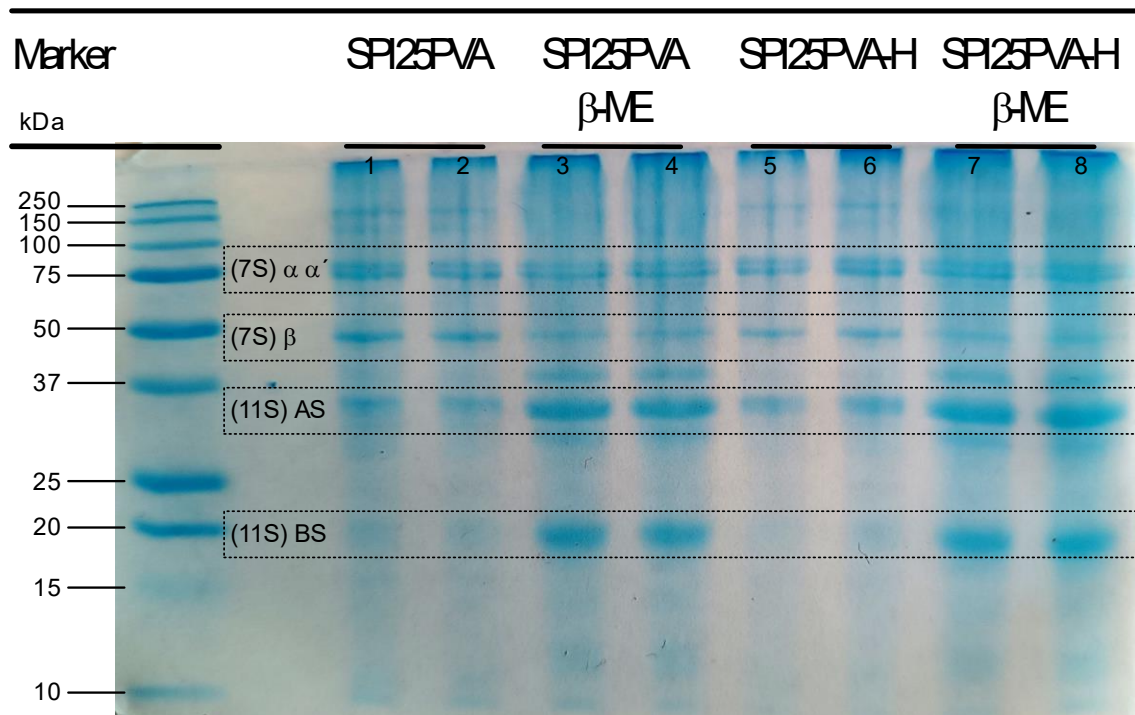

**Figure S1.** SDS-PAGE electrophoresis of SPI25PVA (lines 1 and 2), SPI25PVA reduced by  $\beta$ -ME (lines 3 and 4), SPI25PVA-H (lines 5 and 6), and SPI25PVA-H reduced by  $\beta$ -ME (lines 7 and 8).

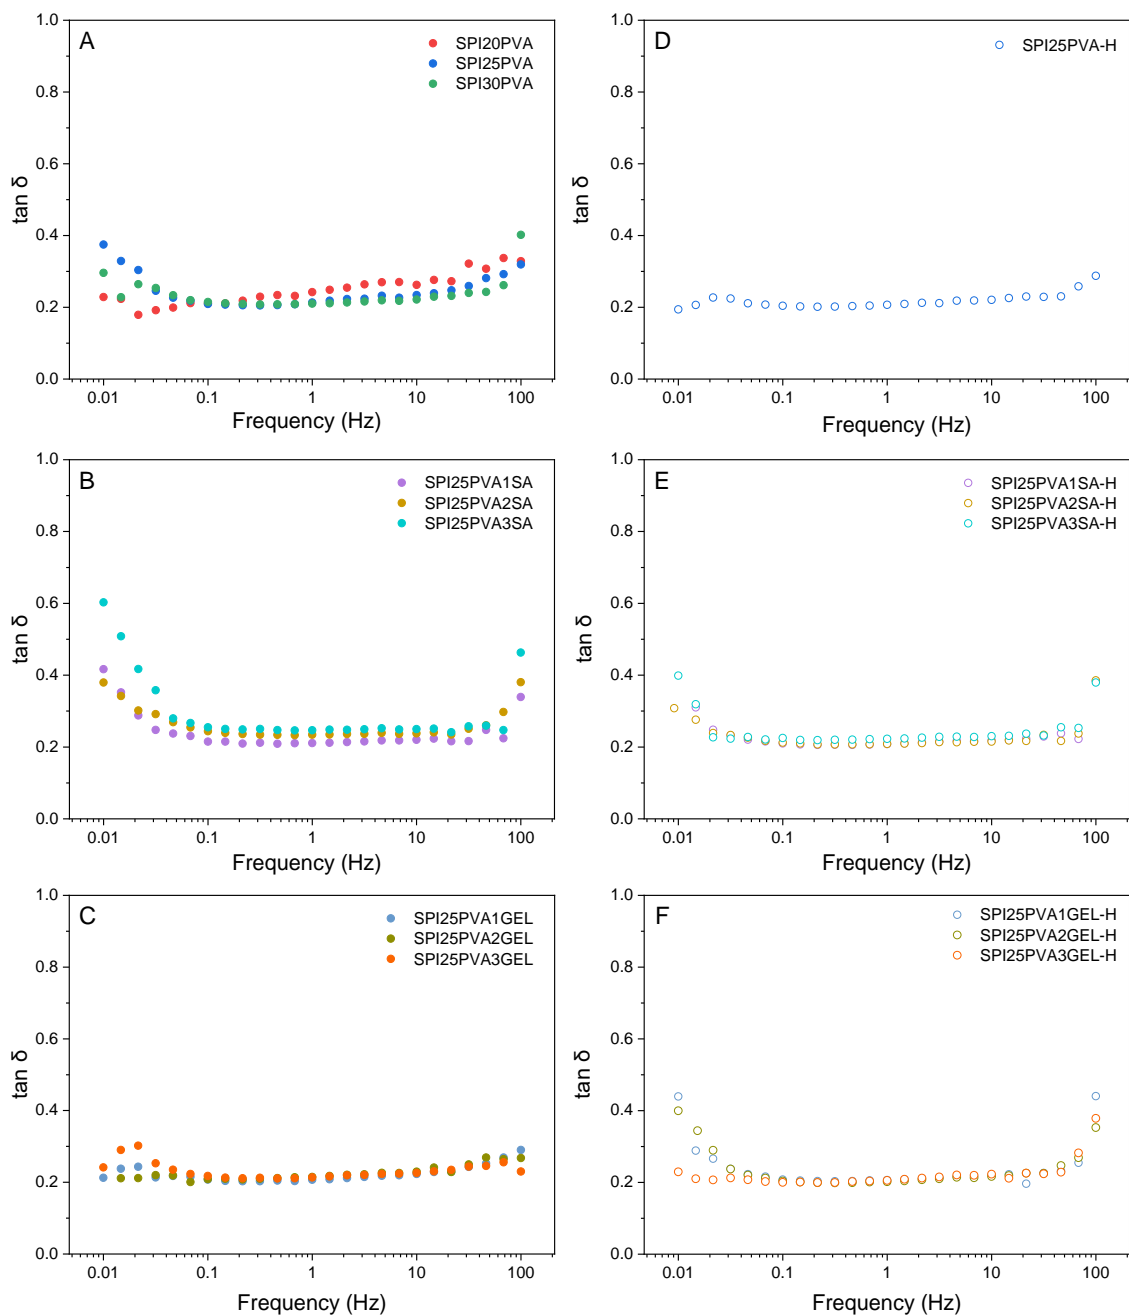

**Figure S2.** Frequency sweeps of SPI inks with different contents of PVA (20, 25 and 30 wt %) before (A) and after heat treatment (D). Frequency sweeps of SPI25PVA ink with different contents of SA (1, 2, and 3 wt %) before (B) and after heat treatment (E). Frequency sweeps of SPI25PVA ink with different contents of GEL (1, 2, and 3 wt %) before (C) and after heat treatment (F).

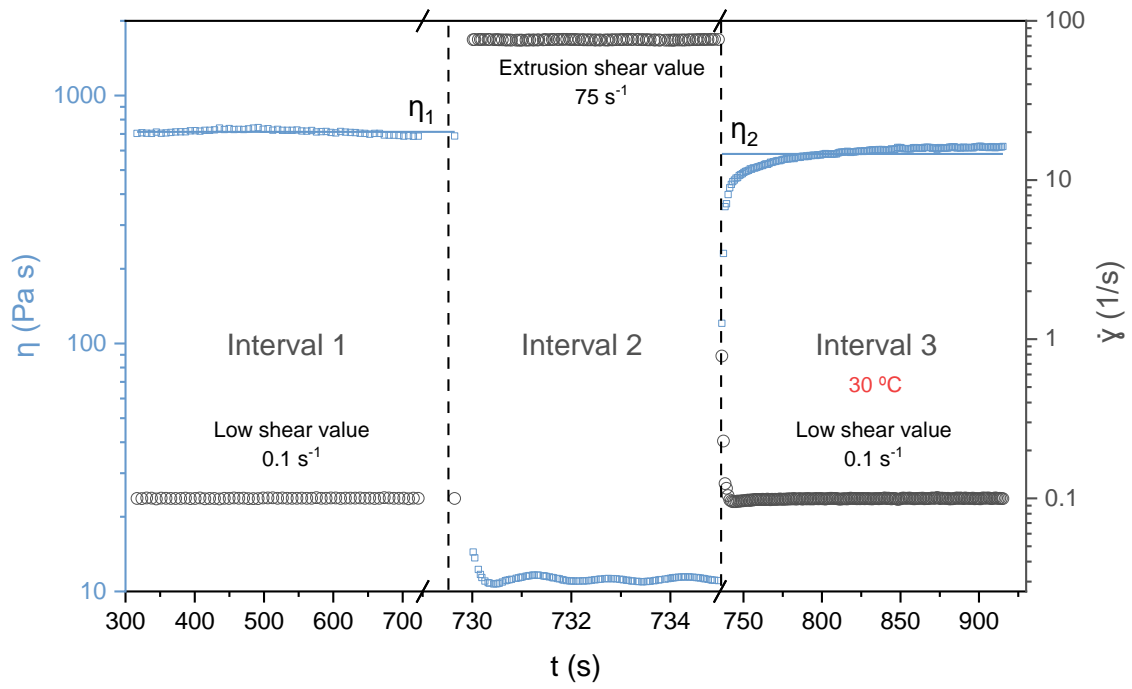

**Figure S3.** Three interval thixotropy test results for SPI25PVA1GEL ink at 30 °C recovery temperature. Mean values of viscosity at interval 1 ( $\eta_1$ ) and interval 3 ( $\eta_2$ ) were used to calculate the recovery percentage shown in equation (3).

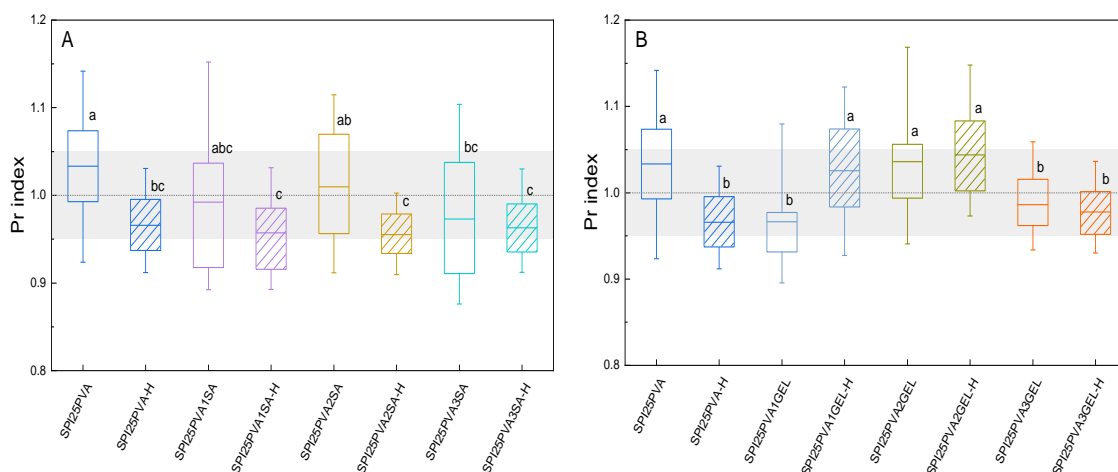

**Figure S4.** Printability index for SPI25PVA inks with A) different contents of SA (1, 2, and 3 wt %) and B) different contents of GEL (1, 2, and 3 wt %). Line patterns are used for heat-treated (H) inks. The maximum and minimum values are represented with the whiskers. The boxes in the plot represent the 75<sup>th</sup> and 25<sup>th</sup> quartiles, indicating the range of the middle 50% of the data. The line inside the box represents the mean value. SPI25PVA ink was used as a control, and statistical significance was calculated for each plotted group (A and B). Means with different letters are significantly different ( $p \leq 0.05$ ) according to Tukey's multiple comparison test.
